# Supplementary material for: Fluorescent Si QD decoration onto a flexible polymeric electrospun nanofibrous mat for the colorimetric sensing of TNT
Source: Royal Society of Chemistry journal article supplement (doi:10.1039/c6tc05521d), 2017-01-01
Supplement: c6tc05521d1.pdf [file c6tc05521d1.pdf]

## Supporting Info

### **Fluorescent Si QD Decoration onto Flexible Polymeric Electrospun Nanofibrous Mat for Colorimetric Sensing of TNT**

Osman Arslan<sup>1\*</sup> Zeynep Aytac<sup>2</sup>, Tamer Uyar<sup>1,2\*</sup>

<sup>1</sup> UNAM-National Nanotechnology Research Center, Bilkent University, 06800, Ankara, Turkey

<sup>2</sup> Institute of Materials Science & Nanotechnology, Bilkent University, Ankara, 06800, Turkey

\*Corresponding authors: T.U. [uyar@unam.bilkent.edu.tr](mailto:uyar@unam.bilkent.edu.tr), O.A. [arslan@unam.bilkent.edu.tr](mailto:arslan@unam.bilkent.edu.tr)

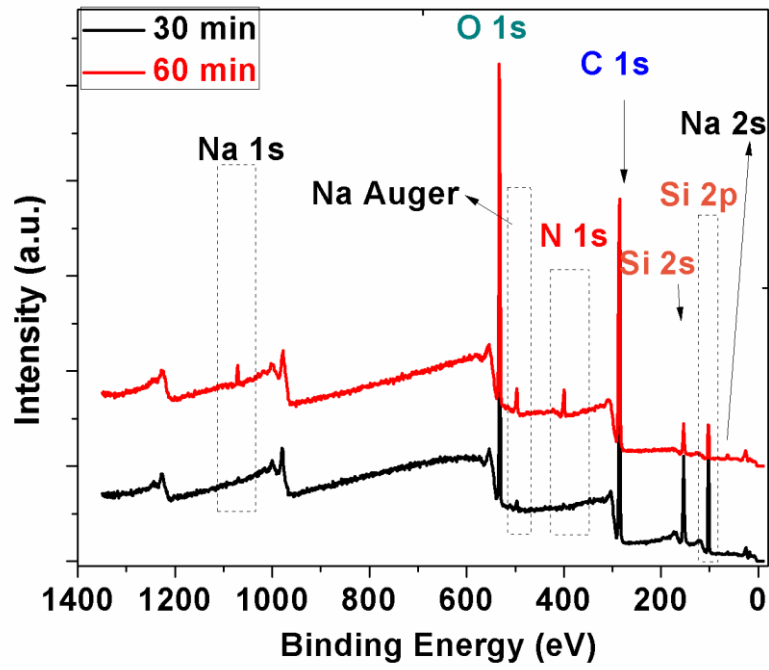

Figure S1 : XPS survey analysis of the Si QD-30 and Si QD-60 samples.

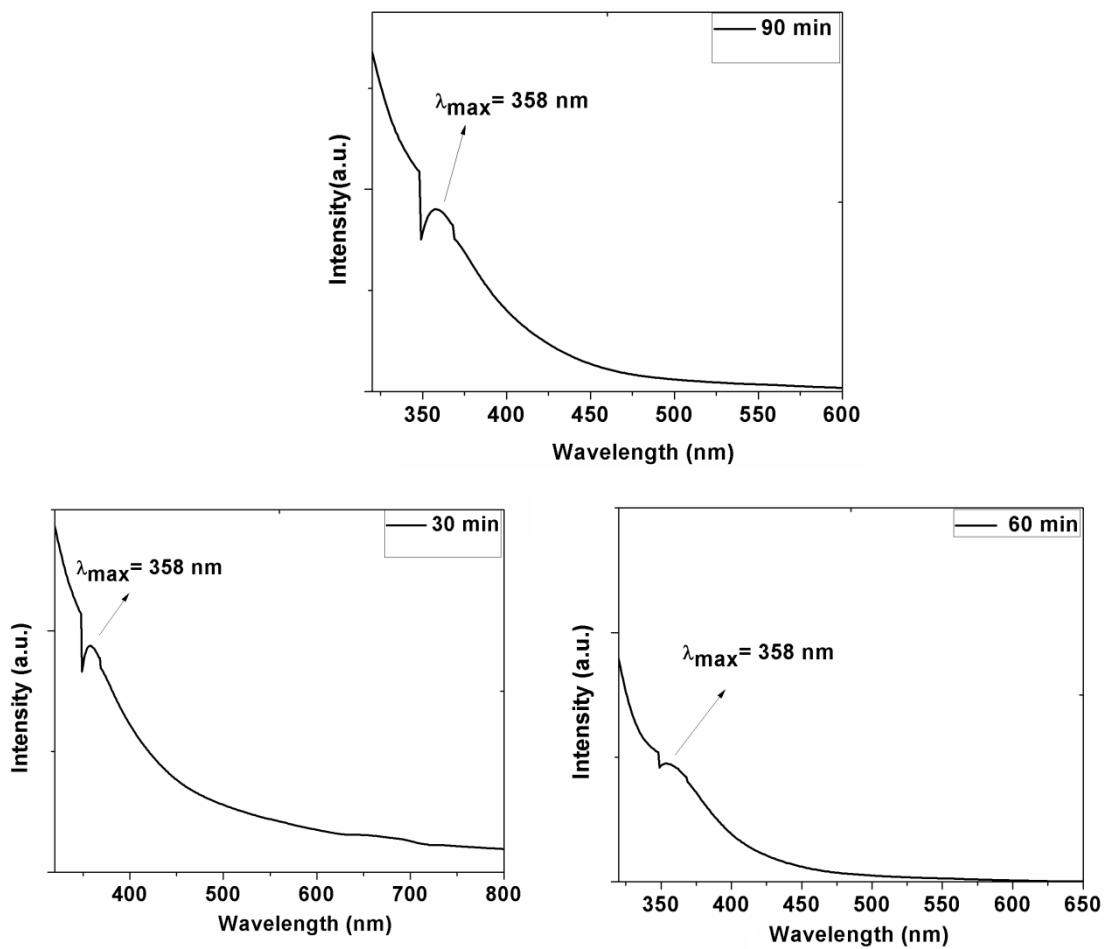

Figure S2 : UV absorption features of the fluorescent Si QD after 30, 60 and 90 minutes UV treatment.

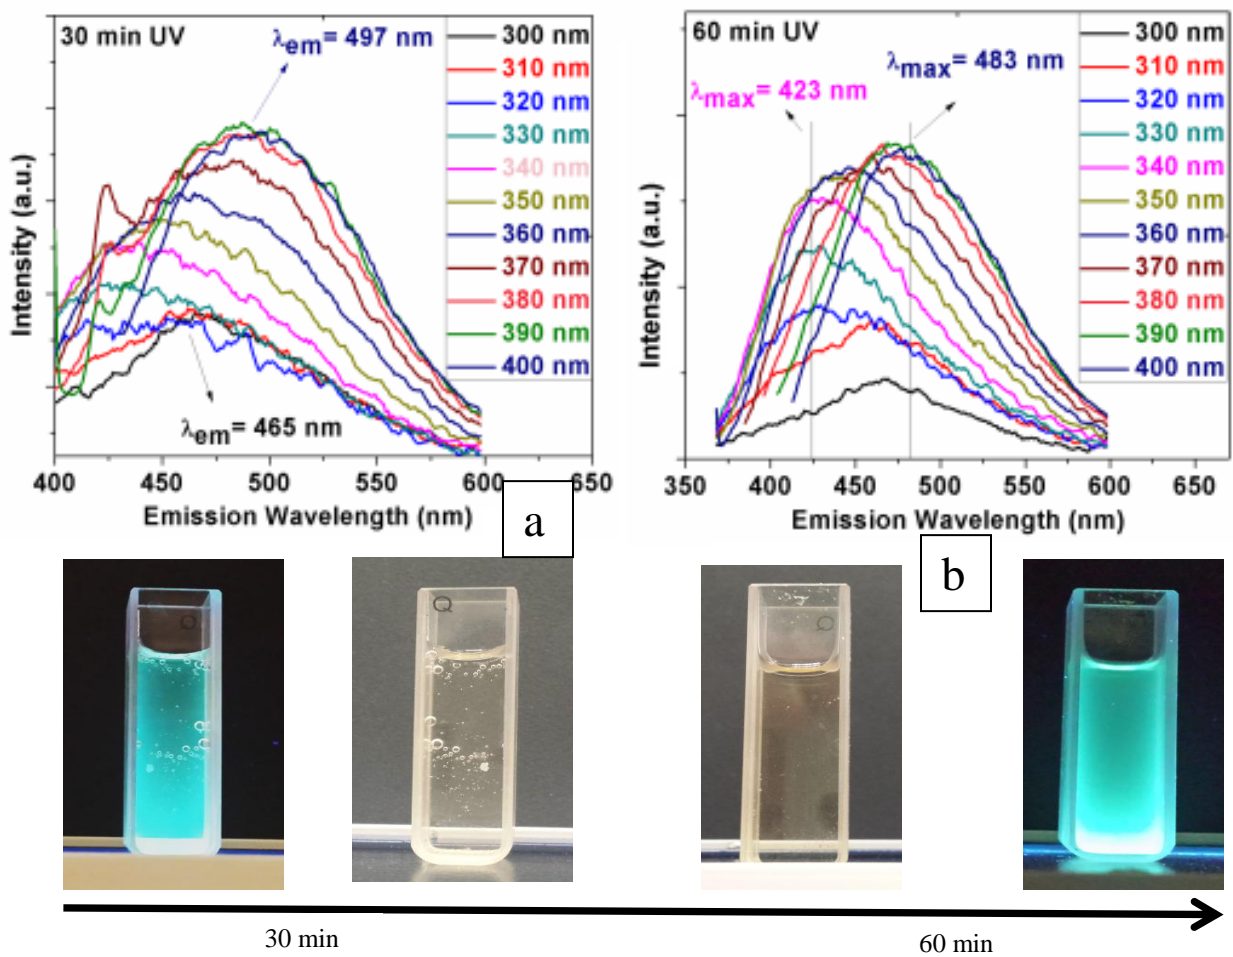

Figure S3: PL of the Si QD after a) 30 minutes and after b) 60 minutes UV treatment with different excitation wavelengths and their corresponding visible light emissions under UV excitation

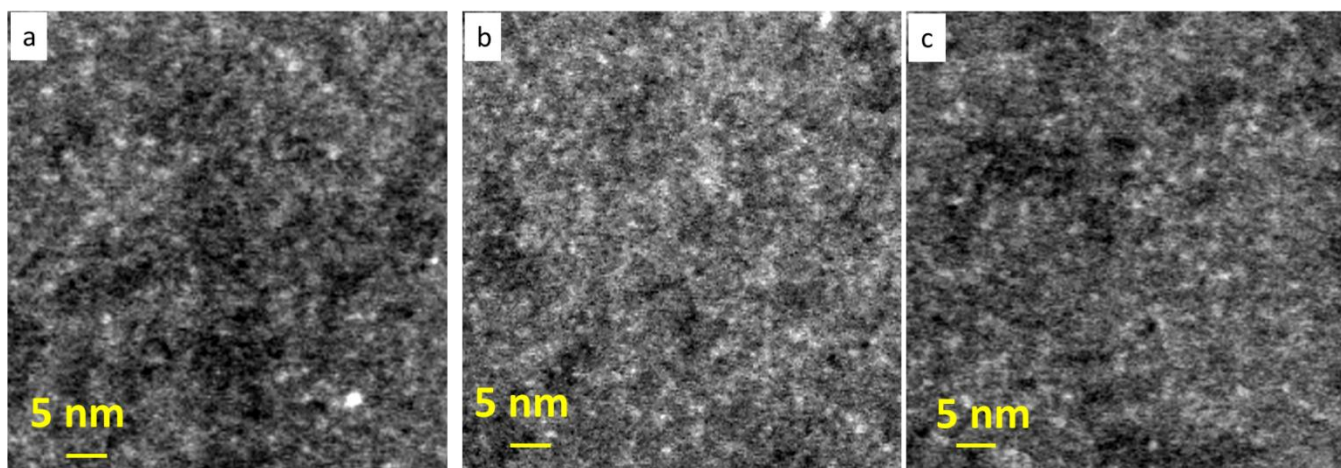

Figure S4: a) Representative STEM images of the a) Si QD-90 b) Si QD-30 and c) Si QD-60.

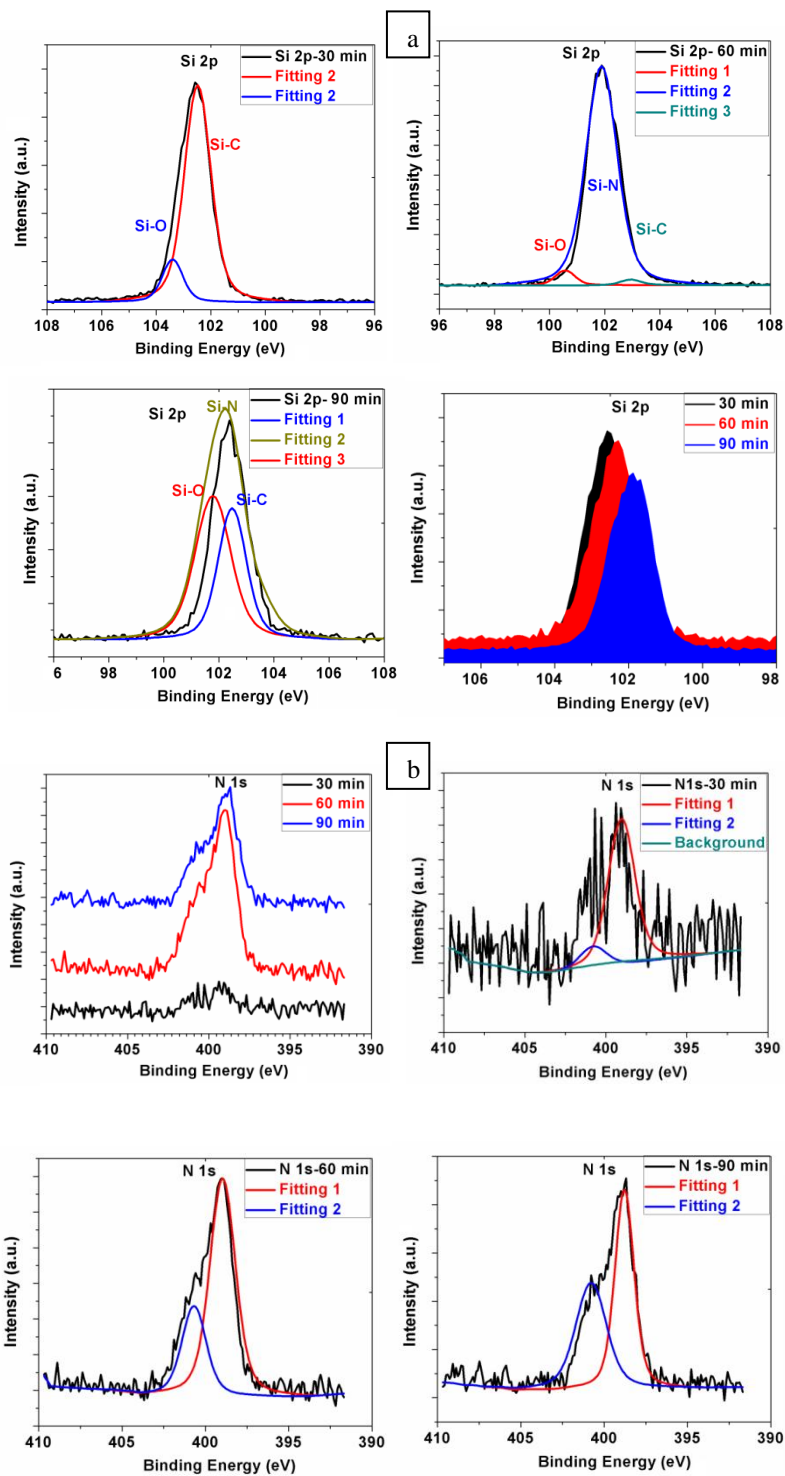

Figure S5 : High resolution XPS analysis of the a) Si 2p peaks for and b) N 1s peaks.

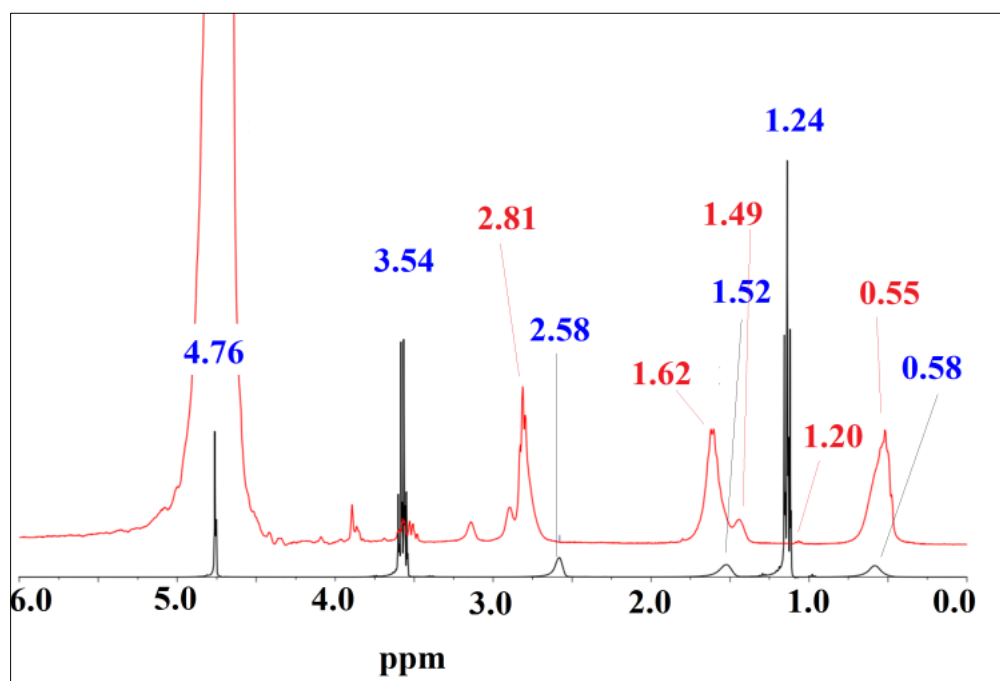

Figure S6: <sup>1</sup>H-NMR spectrum for the 90 minutes UV treated Si QD to detect their surface characteristics.

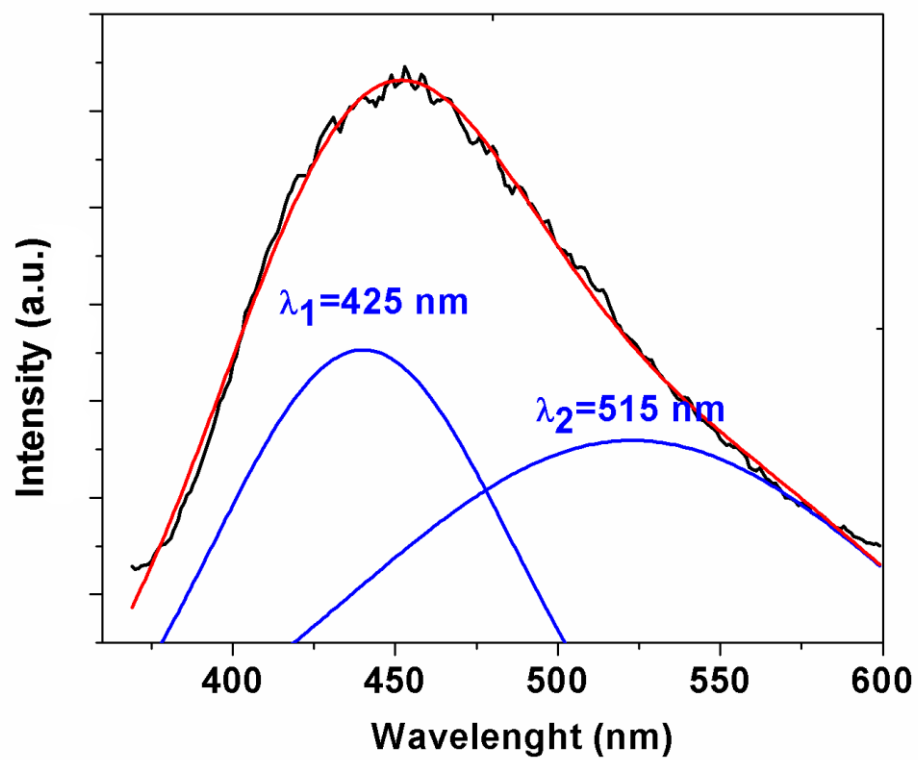

Figure S7 : Deconvolution of the fluorescence peak for detecting the surface and size effects of the Si QD.



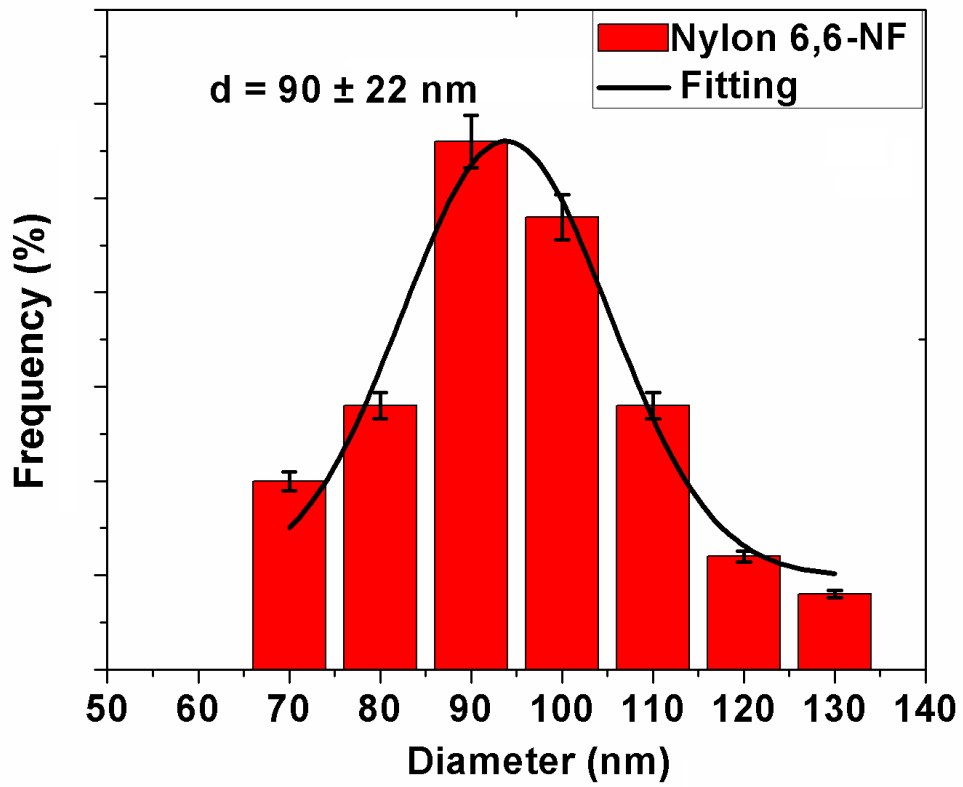

Figure S8 : Diameter distribution of the electrospun Nylon 6,6 nanofibrous mat.

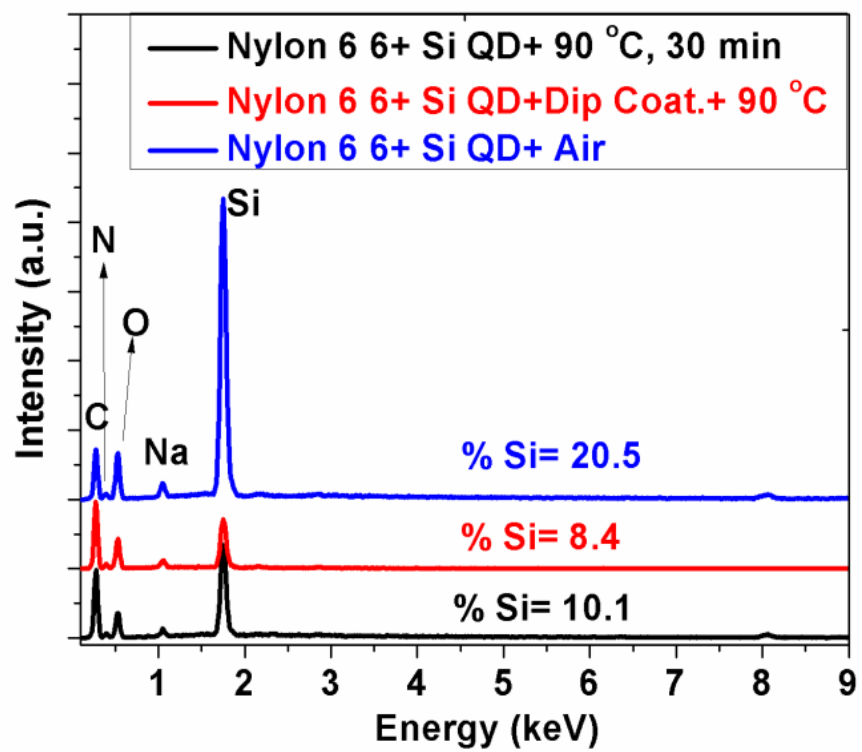

Figure S9 : Quantitative EDX analysis of the three different decoration and curing technique.

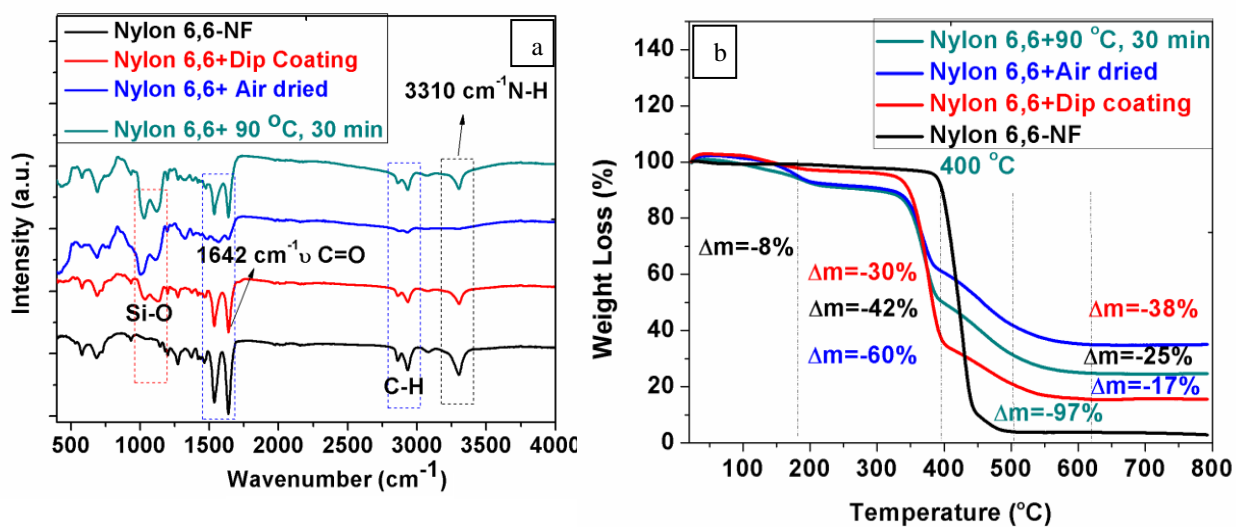

Figure S10 : FT-IR analysis and comparison for the Si QD-90 decoration onto the Nylon 6,6-NF by impregnation and dip coating processes b) thermal analysis of the Si QD-90 decoration onto the Nylon 6,6-NF by impregnation and dip coating processes

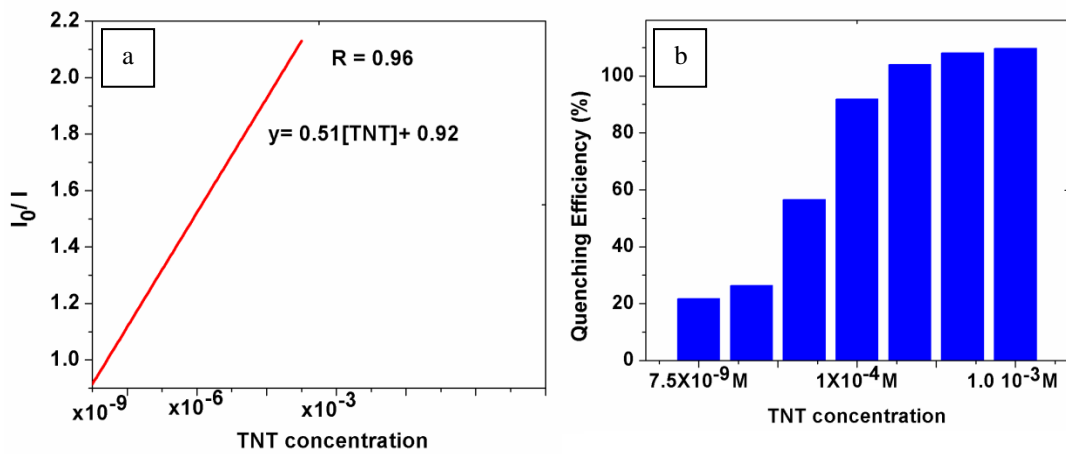

Figure S11 : Stern-Volmer plot for the different concentrations of the TNT b) Comparison for the quenching efficiencies.

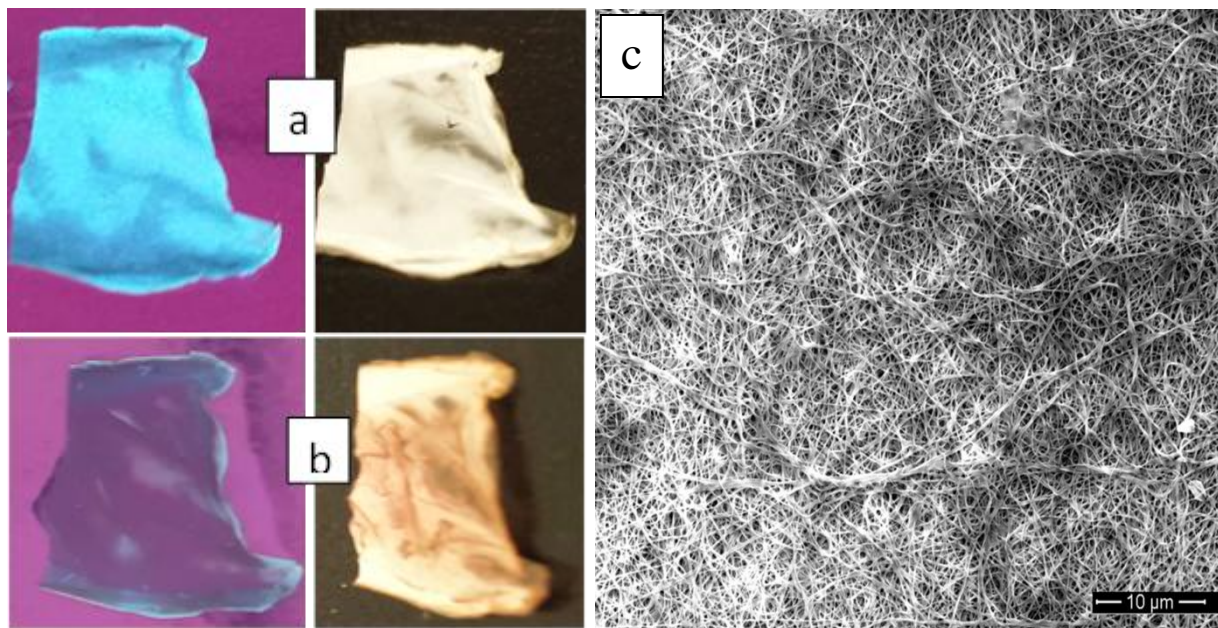

Figure S12: a-b) Visual appearance of the dip coated Si QD-90 deposited nanofibrous mat under UV light and visible light a) before TNT sensing, b) after TNT sensing, c) SEM image of the Si QD-90 decorated Nylon-6-6-NF after TNT sensing.

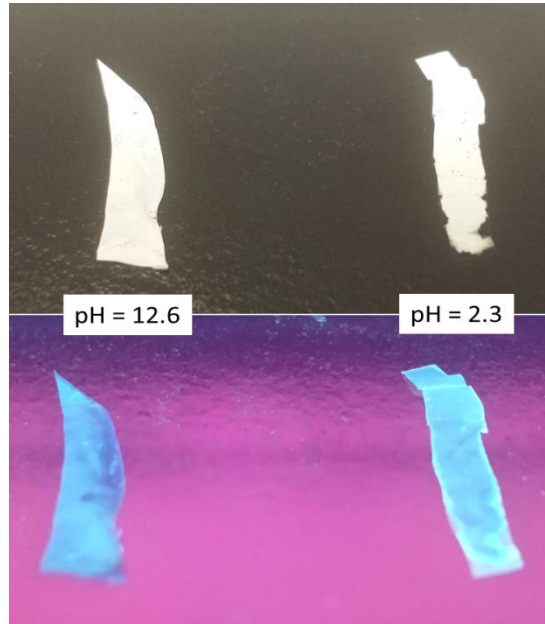

Figure S13 : Extreme acidic and basic treatment and pH resistance of the Si QD decorated Nylon 6,6-NF. Images of Si QD decorated Nylon 6,6 nanofibrous mat under visible light (top images) and under UV light (bottom images)

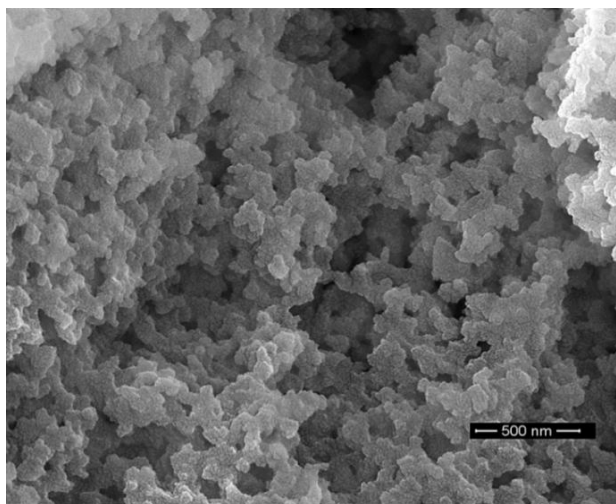

Figure S14: Representative SEM image of the Si-90 containing SiO<sub>2</sub> nanoparticles.

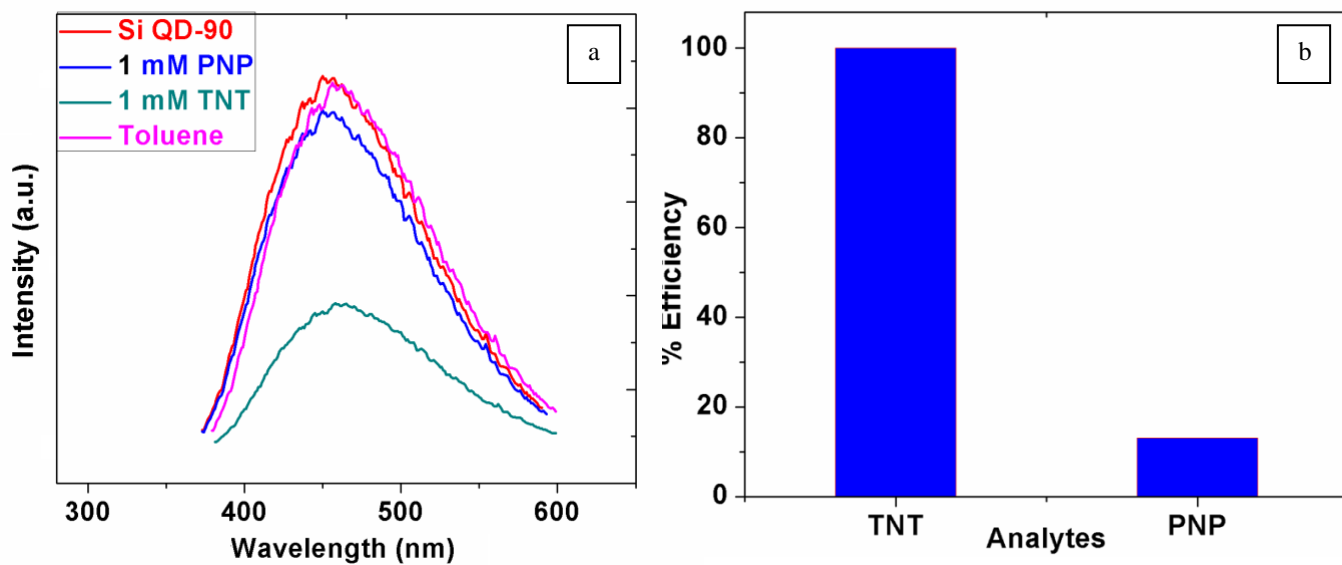

Figure S15 : a) PL quenching comparison for the PNP, TNT and pure toluene b) Comparison of the sensing efficiencies tested with TNT, para nitro toluene (PNP)
